# Supplementary material for: Identification of Familial Hodgkin Lymphoma Predisposing Genes Using Whole Genome Sequencing
Source: Front Bioeng Biotechnol. 2020 Mar 6;8:179. doi: 10.3389/fbioe.2020.00179 (PMC7067901; doi:10.3389/fbioe.2020.00179)
Supplement: Supplementary file 3 [file Table_2.XLS]

## Sheet: S2A. Canonical Pathways
© 2000-2019 QIAGEN. All rights reserved.
Ingenuity Canonical Pathways	-log(p-value)	Ratio	Molecules
Synaptogenesis Signaling Pathway	3.06	0.0481	CDH2,CDH22,EIF4EBP3,EPHA1,EPHB6,GPAA1,GRIA3,GRM7,GSK3B,LRP1,LYN,MARCKS,NAPB,SNAP25,SYN2
PI3K Signaling in B Lymphocytes	2.34	0.058	CD81,IRS1,LYN,NFAT5,NFATC2,NFKBIA,PLCB1,PLEKHA3
Germ Cell-Sertoli Cell Junction Signaling	2.28	0.0523	ACTN3,CDH2,IQGAP1,MAP3K5,PXN,RHOB,RHOJ,TUBA8,TUBB2A
B Cell Receptor Signaling	2.08	0.0486	BCL6,ETS1,GSK3B,LYN,MAP3K5,NFAT5,NFATC2,NFKBIA,SYNJ2
Protein Kinase A Signaling	2.06	0.0376	DUSP22,GNB2,GSK3B,NFAT5,NFATC2,NFKBIA,PLCB1,PTCH1,PTP4A1,PTPRB,PTPRG,PTPRR,PXN,RHO,TTN
Huntington's Disease Signaling	1.84	0.0422	CAPN11,CASQ1,GLS,GNB2,GPAA1,HDAC11,HSPA1L,NAPB,PLCB1,SNAP25
Role of NFAT in Regulation of the Immune Response	1.67	0.0442	GNB2,GSK3B,LYN,NFAT5,NFATC2,NFKBIA,PLCB1,XPO1
Axonal Guidance Signaling	1.66	0.0329	ADAMTS9,COPS5,EPHA1,EPHB6,GNB2,GSK3B,MMP24,NFAT5,NFATC2,NRP2,PLCB1,PTCH1,PXN,SLIT1,TUBA8,TUBB2A
Phagosome Maturation	1.63	0.0467	GPAA1,NAPB,SNAP25,TUBA8,TUBB2A,TUBE1,VPS33B
Role of JAK2 in Hormone-like Cytokine Signaling	1.59	0.0882	HLTF,IRS1,SOCS3
Autophagy	1.56	0.0656	ATG13,BECN1,ULK1,VPS33B
Gαq Signaling	1.54	0.0446	GNB2,GSK3B,NFATC2,NFKBIA,PLCB1,RHOB,RHOJ
Wnt/Ca+ pathway	1.54	0.0645	GSK3B,NFAT5,NFATC2,PLCB1
Regulation of Cellular Mechanics by Calpain Protease	1.45	0.0606	ACTN3,CAPN11,EZR,PXN
April Mediated Signaling	1.44	0.0769	NFAT5,NFATC2,NFKBIA
Inhibition of Matrix Metalloproteases	1.44	0.0769	HSPG2,LRP1,MMP24
Epoxysqualene Biosynthesis	1.43	0.5	SQLE
Choline Degradation I	1.43	0.5	CHDH
GDP-L-fucose Biosynthesis II (from L-fucose)	1.43	0.5	FUK
GDP-L-fucose Biosynthesis I (from GDP-D-mannose)	1.43	0.5	GMDS
Glutamine Degradation I	1.43	0.5	GLS
Apoptosis Signaling	1.41	0.0505	BIRC6,CAPN11,MAP3K5,NFKBIA,SPTAN1
Tight Junction Signaling	1.4	0.0417	CNKSR3,GPAA1,NAPB,PPP2R2C,SNAP25,SPTAN1,TJP3
Signaling by Rho Family GTPases	1.39	0.037	CDH2,CDH22,CYFIP1,EZR,GNB2,IQGAP1,RHOB,RHOJ,SEPT6
Remodeling of Epithelial Adherens Junctions	1.39	0.058	ACTN3,IQGAP1,TUBA8,TUBB2A
B Cell Activating Factor Signaling	1.39	0.0732	NFAT5,NFATC2,NFKBIA
Sumoylation Pathway	1.35	0.0485	ETS1,MAP3K5,NFKBIA,RHOB,RHOJ
mTOR Signaling	1.35	0.0381	ATG13,EIF4G3,IRS1,MAPKAP1,PPP2R2C,RHOB,RHOJ,ULK1
Phospholipase C Signaling	1.27	0.035	GNB2,HDAC11,LYN,MARCKS,NFAT5,NFATC2,PLCB1,RHOB,RHOJ
FAT10 Cancer Signaling Pathway	1.26	0.0652	GSK3B,HOXB9,NFKBIA
Sertoli Cell-Sertoli Cell Junction Signaling	1.21	0.0376	ACTN3,GSK3B,MAP3K5,SPTAN1,TJP3,TUBA8,TUBB2A
fMLP Signaling in Neutrophils	1.17	0.0431	GNB2,NFAT5,NFATC2,NFKBIA,PLCB1
Epithelial Adherens Junction Signaling	1.16	0.0392	ACTN3,CDH2,IQGAP1,NOTCH3,TUBA8,TUBB2A
ILK Signaling	1.16	0.0366	ACTN3,GSK3B,IRS1,PPP2R2C,PXN,RHOB,RHOJ
Sphingosine-1-phosphate Signaling	1.16	0.0427	CASQ1,PLCB1,RHOB,RHOJ,SPHK1
Uracil Degradation II (Reductive)	1.14	0.25	DPYD
Methylmalonyl Pathway	1.14	0.25	MMUT
Thymine Degradation	1.14	0.25	DPYD
IL-4 Signaling	1.12	0.0471	IRS1,NFAT5,NFATC2,SYNJ2
Phototransduction Pathway	1.11	0.0566	GUCA2B,OPN4,RHO
RhoA Signaling	1.09	0.0407	EPHA1,EZR,NRP2,SEPT6,TTN
Apelin Liver Signaling Pathway	1.07	0.0769	GSK3B,IRS1
Unfolded protein response	1.06	0.0536	EDEM1,HSPA1L,MAP3K5
Tetrapyrrole Biosynthesis II	1.04	0.2	ALAD
2-oxobutanoate Degradation I	1.04	0.2	MMUT
14-3-3-mediated Signaling	1.04	0.0394	GSK3B,MAP3K5,PLCB1,TUBA8,TUBB2A
Glutamate Receptor Signaling	1.04	0.0526	GLS,GRIA3,GRM7
Death Receptor Signaling	1.04	0.044	MAP3K5,NFKBIA,SPTAN1,TNKS2
Th17 Activation Pathway	1.04	0.044	IL12A,NFAT5,NFATC2,SOCS3
CXCR4 Signaling	1.02	0.0359	GNB2,LYN,PLCB1,PXN,RHOB,RHOJ
Factors Promoting Cardiogenesis in Vertebrates	1.01	0.043	CER1,GSK3B,LRP1,LRP6
Gα12/13 Signaling	1.01	0.0385	CDH2,CDH22,MAP3K5,NFKBIA,PXN
PI3K/AKT Signaling	0.987	0.0379	GSK3B,MAP3K5,NFKBIA,PPP2R2C,SYNJ2
Colorectal Cancer Metastasis Signaling	0.979	0.0316	GNB2,GSK3B,LRP1,LRP6,MMP24,PTGER1,RHOB,RHOJ
Acetone Degradation I (to Methylglyoxal)	0.967	0.0667	CYP2C9,CYP4A22
Wnt/β-catenin Signaling	0.967	0.0347	CDH2,GSK3B,LRP1,LRP6,PPP2R2C,SOX2
Sonic Hedgehog Signaling	0.967	0.0667	GSK3B,PTCH1
Integrin Signaling	0.963	0.0327	ACTN3,CAPN11,GSK3B,PXN,RHOB,RHOJ,TTN
T Cell Exhaustion Signaling Pathway	0.951	0.0343	BCL6,IFNA10,IL12A,NFAT5,NFATC2,PPP2R2C
G Protein Signaling Mediated by Tubby	0.943	0.0645	GNB2,PLCB1
Role of PI3K/AKT Signaling in the Pathogenesis of Influenza	0.928	0.0469	GSK3B,IFNA10,NFKBIA
Actin Cytoskeleton Signaling	0.924	0.032	ACTN3,CYFIP1,EZR,IQGAP1,NCKAP1L,PXN,TTN
4-1BB Signaling in T Lymphocytes	0.921	0.0625	MAP3K5,NFKBIA
Molecular Mechanisms of Cancer	0.917	0.0281	GSK3B,IRS1,LRP1,LRP6,MAP3K5,NFKBIA,PLCB1,PRKDC,PTCH1,RHOB,RHOJ
Role of Osteoblasts, Osteoclasts and Chondrocytes in Rheumatoid Arthritis	0.917	0.0318	GSK3B,LRP1,LRP6,MAP3K5,NFAT5,NFATC2,NFKBIA
RhoGDI Signaling	0.91	0.0333	CDH2,CDH22,EZR,GNB2,RHOB,RHOJ
IL-9 Signaling	0.896	0.0606	IRS1,SOCS3
IL-17A Signaling in Fibroblasts	0.857	0.0571	GSK3B,NFKBIA
Synaptic Long Term Depression	0.854	0.0321	GRIA3,GRM7,LYN,NPR3,PLCB1,PPP2R2C
Interferon Signaling	0.836	0.0556	IFI6,OAS1
Systemic Lupus Erythematosus In B Cell Signaling Pathway	0.833	0.0291	GSK3B,IFNA10,IL12A,IL17B,LYN,NFAT5,NFATC2,SYNJ2
Cell Cycle Regulation by BTG Family Proteins	0.818	0.0541	HOXB9,PPP2R2C
Ephrin B Signaling	0.815	0.0417	EPHB6,GNB2,PXN
iCOS-iCOSL Signaling in T Helper Cells	0.807	0.036	NFAT5,NFATC2,NFKBIA,PLEKHA3
Type I Diabetes Mellitus Signaling	0.807	0.036	IL12A,MAP3K5,NFKBIA,SOCS3
Citrulline Biosynthesis	0.804	0.111	GLS
Heme Biosynthesis II	0.804	0.111	ALAD
Hypoxia Signaling in the Cardiovascular System	0.79	0.0405	BIRC6,COPS5,NFKBIA
Cardiac Hypertrophy Signaling	0.78	0.0292	GNB2,GSK3B,IRS1,MAP3K5,PLCB1,RHOB,RHOJ
tRNA Charging	0.78	0.0513	QARS,VARS2
Embryonic Stem Cell Differentiation into Cardiac Lineages	0.764	0.1	SOX2
Breast Cancer Regulation by Stathmin1	0.759	0.03	GNB2,PLCB1,PPP2R2C,TRPC5,TUBA8,TUBB2A
Mechanisms of Viral Exit from Host Cells	0.747	0.0488	SH3GL2,XPO1
Triacylglycerol Biosynthesis	0.747	0.0488	ELOVL2,GPAT2
Role of Wnt/GSK-3β Signaling in the Pathogenesis of Influenza	0.745	0.0385	GSK3B,IFNA10,NCOA2
IL-7 Signaling Pathway	0.745	0.0385	BCL6,GSK3B,LYN
Cholecystokinin/Gastrin-mediated Signaling	0.733	0.0336	PLCB1,PXN,RHOB,RHOJ
Purine Nucleotides De Novo Biosynthesis II	0.726	0.0909	GMPS
Calcium Signaling	0.719	0.0291	CASQ1,GRIA3,HDAC11,NFAT5,NFATC2,TRPC5
IL-15 Production	0.717	0.0331	DDR1,EPHA1,LYN,PTK6
Role of Hypercytokinemia/hyperchemokinemia in the Pathogenesis of Influenza	0.714	0.0465	IFNA10,IL12A
Cyclins and Cell Cycle Regulation	0.712	0.037	GSK3B,HDAC11,PPP2R2C
Th1 Pathway	0.708	0.0328	IL12A,NFATC2,NOTCH3,SOCS3
Role of RIG1-like Receptors in Antiviral Innate Immunity	0.701	0.0455	IFNA10,NFKBIA
IL-23 Signaling Pathway	0.701	0.0455	NFKBIA,SOCS3
Stearate Biosynthesis I (Animals)	0.686	0.0444	CYP4A22,ELOVL2
AMPK Signaling	0.682	0.0283	HLTF,IRS1,PPM1A,PPM1B,PPP2R2C,ULK1
Phagosome Formation	0.682	0.032	MARCKS,PLCB1,RHOB,RHOJ
Role of Oct4 in Mammalian Embryonic Stem Cell Pluripotency	0.672	0.0435	NR2F2,SOX2
Cholesterol Biosynthesis I	0.662	0.0769	SQLE
Cholesterol Biosynthesis II (via 24,25-dihydrolanosterol)	0.662	0.0769	SQLE
Cholesterol Biosynthesis III (via Desmosterol)	0.662	0.0769	SQLE
Pregnenolone Biosynthesis	0.662	0.0769	CYP4A22
p70S6K Signaling	0.652	0.031	IRS1,LYN,PLCB1,PPP2R2C
Ceramide Signaling	0.642	0.0341	CERK,PPP2R2C,SPHK1
RANK Signaling in Osteoclasts	0.642	0.0341	MAP3K5,NFATC2,NFKBIA
Role of Macrophages, Fibroblasts and Endothelial Cells in Rheumatoid Arthritis	0.633	0.0256	GSK3B,LRP1,LRP6,NFAT5,NFATC2,NFKBIA,PLCB1,SOCS3
Regulation of IL-2 Expression in Activated and Anergic T Lymphocytes	0.633	0.0337	NFAT5,NFATC2,NFKBIA
DNA Double-Strand Break Repair by Non-Homologous End Joining	0.633	0.0714	PRKDC
Colanic Acid Building Blocks Biosynthesis	0.633	0.0714	GMDS
Telomere Extension by Telomerase	0.607	0.0667	TNKS2
Superpathway of Citrulline Metabolism	0.607	0.0667	GLS
Histidine Degradation VI	0.607	0.0667	CYP4A22
Amyloid Processing	0.606	0.0392	CAPN11,GSK3B
Triacylglycerol Degradation	0.593	0.0385	ABHD16A,PNPLA7
Th2 Pathway	0.592	0.0292	IL12A,NFATC2,NOTCH3,SOCS3
Fcγ Receptor-mediated Phagocytosis in Macrophages and Monocytes	0.588	0.0319	EZR,LYN,PXN
Dendritic Cell Maturation	0.585	0.0273	IL12A,LY75,NFKBIA,PLCB1,RELB
Granzyme B Signaling	0.583	0.0625	PRKDC
CD27 Signaling in Lymphocytes	0.582	0.0377	MAP3K5,NFKBIA
Lymphotoxin β Receptor Signaling	0.582	0.0377	NFKBIA,RELB
Systemic Lupus Erythematosus Signaling	0.58	0.0261	IFNA10,LYN,NFAT5,NFATC2,PRPF19,PRPF4B
FAK Signaling	0.58	0.0316	CAPN11,PXN,TNS1
Insulin Receptor Signaling	0.578	0.0288	GSK3B,IRS1,SOCS3,SYNJ2
Role of Cytokines in Mediating Communication between Immune Cells	0.57	0.037	IFNA10,IL12A
ATM Signaling	0.562	0.0309	NFKBIA,PPP2R2C,TRRAP
RAN Signaling	0.561	0.0588	XPO1
Ubiquinol-10 Biosynthesis (Eukaryotic)	0.561	0.0588	CYP4A22
D-myo-inositol (1,4,5)-trisphosphate Degradation	0.561	0.0588	SYNJ2
Type II Diabetes Mellitus Signaling	0.559	0.0282	IRS1,MAP3K5,NFKBIA,SOCS3
Production of Nitric Oxide and Reactive Oxygen Species in Macrophages	0.556	0.0266	MAP3K5,NFKBIA,PPP2R2C,RHOB,RHOJ
p53 Signaling	0.554	0.0306	GSK3B,PRKDC,TP53INP1
Differential Regulation of Cytokine Production in Macrophages and T Helper Cells by IL-17A and IL-17F	0.539	0.0556	IL12A
1D-myo-inositol Hexakisphosphate Biosynthesis II (Mammalian)	0.539	0.0556	SYNJ2
D-myo-inositol (1,3,4)-trisphosphate Biosynthesis	0.539	0.0556	SYNJ2
Methylglyoxal Degradation III	0.539	0.0556	CYP4A22
FAT10 Signaling Pathway	0.539	0.0556	UBA6
Neuropathic Pain Signaling In Dorsal Horn Neurons	0.532	0.0297	GRIA3,GRM7,PLCB1
MSP-RON Signaling Pathway	0.527	0.0345	F11,IL12A
RAR Activation	0.524	0.0258	HLTF,MAP3K5,NR2F2,RDH14,RELB
Sirtuin Signaling Pathway	0.511	0.024	ATG13,BECN1,GLS,GSK3B,NDUFA8,PRKDC,TUBA8
IGF-1 Signaling	0.51	0.0288	IRS1,PXN,SOCS3
Semaphorin Signaling in Neurons	0.509	0.0333	RHOB,RHOJ
Retinoic acid Mediated Apoptosis Signaling	0.509	0.0333	IFNA10,TNKS2
Adrenomedullin signaling pathway	0.509	0.0254	GSK3B,NPR3,PLCB1,RAMP2,TTN
Leukocyte Extravasation Signaling	0.503	0.0253	ACTN3,EZR,MMP24,PXN,RAPGEF4
Gap Junction Signaling	0.503	0.0253	GRIA3,NPR3,PLCB1,TUBA8,TUBB2A
CDP-diacylglycerol Biosynthesis I	0.502	0.05	GPAT2
The Visual Cycle	0.502	0.05	RDH14
T Cell Receptor Signaling	0.502	0.0286	NFAT5,NFATC2,NFKBIA
Induction of Apoptosis by HIV1	0.499	0.0328	MAP3K5,NFKBIA
Telomerase Signaling	0.488	0.028	ETS1,HDAC11,PPP2R2C
Gαs Signaling	0.488	0.028	GNB2,MC2R,RAPGEF4
Endoplasmic Reticulum Stress Pathway	0.484	0.0476	MAP3K5
Activation of IRF by Cytosolic Pattern Recognition Receptors	0.48	0.0317	IFNA10,NFKBIA
PKCθ Signaling in T Lymphocytes	0.48	0.0258	MAP3K5,NFAT5,NFATC2,NFKBIA
Neuroinflammation Signaling Pathway	0.479	0.0233	BIRC6,GLS,GSK3B,IFNA10,IL12A,NFAT5,NFATC2
IL-17A Signaling in Airway Cells	0.471	0.0312	GSK3B,NFKBIA
Regulation of eIF4 and p70S6K Signaling	0.469	0.0255	EIF4EBP3,EIF4G3,IRS1,PPP2R2C
Phosphatidylglycerol Biosynthesis II (Non-plastidic)	0.467	0.0455	GPAT2
PXR/RXR Activation	0.462	0.0308	ABCC3,CYP2C9
HGF Signaling	0.462	0.027	ETS1,MAP3K5,PXN
Netrin Signaling	0.462	0.0308	NFAT5,NFATC2
Mitotic Roles of Polo-Like Kinase	0.453	0.0303	PLK3,PPP2R2C
Role of Lipids/Lipid Rafts in the Pathogenesis of Influenza	0.452	0.0435	IFNA10
Differential Regulation of Cytokine Production in Intestinal Epithelial Cells by IL-17A and IL-17F	0.452	0.0435	IL12A
Superpathway of D-myo-inositol (1,4,5)-trisphosphate Metabolism	0.452	0.0435	SYNJ2
Apelin Cardiac Fibroblast Signaling Pathway	0.452	0.0435	SPHK1
Cell Cycle: G1/S Checkpoint Regulation	0.446	0.0299	GSK3B,HDAC11
IL-22 Signaling	0.438	0.0417	SOCS3
TCA Cycle II (Eukaryotic)	0.438	0.0417	SLC35G3
Tec Kinase Signaling	0.433	0.0244	GNB2,LYN,RHOB,RHOJ
Neuroprotective Role of THOP1 in Alzheimer's Disease	0.431	0.0259	DPP4,F11,TMPRSS7
IL-10 Signaling	0.429	0.029	NFKBIA,SOCS3
Role of JAK1 and JAK3 in γc Cytokine Signaling	0.429	0.029	IRS1,SOCS3
HMGB1 Signaling	0.427	0.0242	IL12A,IL17B,RHOB,RHOJ
Glioblastoma Multiforme Signaling	0.427	0.0242	GSK3B,PLCB1,RHOB,RHOJ
Role of JAK family kinases in IL-6-type Cytokine Signaling	0.424	0.04	SOCS3
Bupropion Degradation	0.424	0.04	CYP2C9
D-myo-inositol (1,4,5)-Trisphosphate Biosynthesis	0.424	0.04	PLCB1
Tryptophan Degradation X (Mammalian, via Tryptamine)	0.424	0.04	RDH14
GM-CSF Signaling	0.421	0.0286	ETS1,LYN
Growth Hormone Signaling	0.415	0.0282	IRS1,SOCS3
CD28 Signaling in T Helper Cells	0.408	0.025	NFAT5,NFATC2,NFKBIA
Actin Nucleation by ARP-WASP Complex	0.407	0.0278	RHOB,RHOJ
G-Protein Coupled Receptor Signaling	0.4	0.0221	GRM7,MC2R,NFKBIA,NPR3,PLCB1,RAPGEF4
T Helper Cell Differentiation	0.399	0.0274	BCL6,IL12A
Basal Cell Carcinoma Signaling	0.399	0.0274	GSK3B,PTCH1
Sperm Motility	0.399	0.0226	DDR1,EPHA1,LYN,PLCB1,PTK6
Th1 and Th2 Activation Pathway	0.395	0.0233	IL12A,NFATC2,NOTCH3,SOCS3
Leptin Signaling in Obesity	0.393	0.027	PLCB1,SOCS3
Glioma Invasiveness Signaling	0.393	0.027	RHOB,RHOJ
Protein Ubiquitination Pathway	0.393	0.022	BIRC6,FBXW7,HSPA1L,PSMD5,USP32,USP39
Superpathway of Cholesterol Biosynthesis	0.386	0.0357	SQLE
Gαi Signaling	0.381	0.024	GNB2,GRM7,NPR3
Erythropoietin Signaling	0.379	0.0263	NFKBIA,SOCS3
Heparan Sulfate Biosynthesis (Late Stages)	0.379	0.0263	EXTL3,PNPLA7
Toll-like Receptor Signaling	0.379	0.0263	IL12A,NFKBIA
PTEN Signaling	0.376	0.0238	CNKSR3,GSK3B,SYNJ2
Antiproliferative Role of Somatostatin Receptor 2	0.372	0.026	GNB2,NPR3
VDR/RXR Activation	0.366	0.0256	IL12A,NCOA2
Reelin Signaling in Neurons	0.366	0.0256	GSK3B,LYN
Agrin Interactions at Neuromuscular Junction	0.366	0.0256	AGRN,PXN
Endocannabinoid Neuronal Synapse Pathway	0.366	0.0234	GRIA3,PLCB1,RIMS1
TNFR2 Signaling	0.364	0.0333	NFKBIA
Synaptic Long Term Potentiation	0.361	0.0233	GRIA3,GRM7,PLCB1
Systemic Lupus Erythematosus In T Cell Signaling Pathway	0.361	0.021	BCL6,CASQ1,EZR,NFATC2,PPP2R2C,RHOB,RHOJ
Ephrin Receptor Signaling	0.36	0.0222	EPHA1,EPHB6,GNB2,PXN
Prolactin Signaling	0.347	0.0247	IRS1,SOCS3
Hepatic Cholestasis	0.343	0.0217	ABCC3,IL12A,IL17B,NFKBIA
LPS-stimulated MAPK Signaling	0.341	0.0244	MAP3K5,NFKBIA
Adipogenesis pathway	0.336	0.0224	FBXW7,HDAC11,NR2F2
Heparan Sulfate Biosynthesis	0.334	0.0241	EXTL3,PNPLA7
Human Embryonic Stem Cell Pluripotency	0.332	0.0222	GSK3B,SOX2,SPHK1
TR/RXR Activation	0.329	0.0238	NCOA2,STRBP
HER-2 Signaling in Breast Cancer	0.329	0.0238	GSK3B,MAP3K5
Inhibition of Angiogenesis by TSP1	0.323	0.0294	HSPG2
MIF-mediated Glucocorticoid Regulation	0.323	0.0294	NFKBIA
Retinoate Biosynthesis I	0.323	0.0294	RDH14
HIPPO signaling	0.323	0.0235	AJUBA,PPP2R2C
Estrogen Receptor Signaling	0.323	0.0219	NCOA2,PRKDC,TRRAP
PPARα/RXRα Activation	0.321	0.0211	CYP2C9,IRS1,NFKBIA,PLCB1
PDGF Signaling	0.318	0.0233	SPHK1,SYNJ2
Coagulation System	0.314	0.0286	F11
TWEAK Signaling	0.314	0.0286	NFKBIA
Regulation of the Epithelial-Mesenchymal Transition Pathway	0.31	0.0207	CDH2,ETS1,GSK3B,NOTCH3
ERK/MAPK Signaling	0.31	0.0207	ETS1,PPP2R2C,PXN,RAPGEF4
Superpathway of Methionine Degradation	0.298	0.027	MMUT
Altered T Cell and B Cell Signaling in Rheumatoid Arthritis	0.297	0.0222	IL12A,RELB
Prostate Cancer Signaling	0.292	0.022	GSK3B,NFKBIA
IL-1 Signaling	0.292	0.022	GNB2,NFKBIA
Docosahexaenoic Acid (DHA) Signaling	0.29	0.0263	GSK3B
Notch Signaling	0.29	0.0263	NOTCH3
IL-8 Signaling	0.289	0.0201	GNB2,IQGAP1,RHOB,RHOJ
Regulation of Actin-based Motility by Rho	0.277	0.0213	RHOB,RHOJ
Relaxin Signaling	0.275	0.0201	GNB2,NFKBIA,NPR3
Role of PKR in Interferon Induction and Antiviral Response	0.268	0.0244	NFKBIA
nNOS Signaling in Skeletal Muscle Cells	0.268	0.0244	SNTB2
Estrogen Biosynthesis	0.268	0.0244	CYP2C9
Amyotrophic Lateral Sclerosis Signaling	0.264	0.0206	CAPN11,GRIA3
CREB Signaling in Neurons	0.264	0.0193	GNB2,GRIA3,GRM7,PLCB1
PAK Signaling	0.264	0.0206	DSCAM,PXN
MIF Regulation of Innate Immunity	0.26	0.0238	NFKBIA
Thrombin Signaling	0.26	0.0192	GNB2,PLCB1,RHOB,RHOJ
Intrinsic Prothrombin Activation Pathway	0.26	0.0238	F11
Retinol Biosynthesis	0.26	0.0238	RDH14
UVA-Induced MAPK Signaling	0.259	0.0204	PLCB1,TNKS2
Role of Pattern Recognition Receptors in Recognition of Bacteria and Viruses	0.256	0.0195	IL12A,IL17B,OAS1
BAG2 Signaling Pathway	0.254	0.0233	HSPA1L
VEGF Signaling	0.25	0.02	ACTN3,PXN
Osteoarthritis Pathway	0.246	0.0188	CASQ1,LRP1,PTCH1,SPHK1
SAPK/JNK Signaling	0.242	0.0196	IRS1,MAP3K5
iNOS Signaling	0.241	0.0222	NFKBIA
HOTAIR Regulatory Pathway	0.24	0.0189	AEBP2,MMP24,NFKBIA
Mouse Embryonic Stem Cell Pluripotency	0.238	0.0194	GSK3B,SOX2
nNOS Signaling in Neurons	0.23	0.0213	CAPN11
Ephrin A Signaling	0.23	0.0213	EPHA1
PD-1, PD-L1 cancer immunotherapy pathway	0.226	0.0189	GSK3B,IL12A
Hematopoiesis from Pluripotent Stem Cells	0.218	0.0204	IL12A
Cell Cycle: G2/M DNA Damage Checkpoint Regulation	0.218	0.0204	PRKDC
TNFR1 Signaling	0.213	0.02	NFKBIA
Glucocorticoid Receptor Signaling	0	0.0179	HLTF,HSPA1L,NCOA2,NFAT5,NFATC2,NFKBIA
Natural Killer Cell Signaling	0	0.0084	SYNJ2
Fc Epsilon RI Signaling	0	0.0171	LYN,SYNJ2
NRF2-mediated Oxidative Stress Response	0	0.0105	GSK3B,MAP3K5
Aryl Hydrocarbon Receptor Signaling	0	0.00699	NCOA2
LPS/IL-1 Mediated Inhibition of RXR Function	0	0.0134	ABCC3,CYP2C9,XPO1
Acute Phase Response Signaling	0	0.0168	MAP3K5,NFKBIA,SOCS3
LXR/RXR Activation	0	0.00826	MYLIP
Mitochondrial Dysfunction	0	0.00585	NDUFA8
FXR/RXR Activation	0	0.00794	FOXA3
Role of BRCA1 in DNA Damage Response	0	0.0125	HLTF
α-Adrenergic Signaling	0	0.0105	GNB2
Clathrin-mediated Endocytosis Signaling	0	0.00518	SH3GL2
IL-12 Signaling and Production in Macrophages	0	0.0152	IFNA10,IL12A
FcγRIIB Signaling in B Lymphocytes	0	0.0133	LYN
NF-κB Activation by Viruses	0	0.0122	NFKBIA
CCR5 Signaling in Macrophages	0	0.0106	GNB2
CD40 Signaling	0	0.0154	NFKBIA
Calcium-induced T Lymphocyte Apoptosis	0	0.0152	NFATC2
IL-17 Signaling	0	0.0125	GSK3B
CTLA4 Signaling in Cytotoxic T Lymphocytes	0	0.0112	PPP2R2C
CCR3 Signaling in Eosinophils	0	0.0161	GNB2,PLCB1
HIF1α Signaling	0	0.0177	COPS5,MMP24
Melatonin Signaling	0	0.0139	PLCB1
Angiopoietin Signaling	0	0.0133	NFKBIA
Cellular Effects of Sildenafil (Viagra)	0	0.00763	PLCB1
Endothelin-1 Signaling	0	0.0108	CASQ1,PLCB1
CDK5 Signaling	0	0.00926	PPP2R2C
Corticotropin Releasing Hormone Signaling	0	0.0138	NPR3,PTCH1
Role of CHK Proteins in Cell Cycle Checkpoint Control	0	0.0175	PPP2R2C
GNRH Signaling	0	0.0173	MAP3K5,PLCB1,PXN
Androgen Signaling	0	0.0147	GNB2,NCOA2
Aldosterone Signaling in Epithelial Cells	0	0.0127	HSPA1L,PLCB1
Role of NANOG in Mammalian Embryonic Stem Cell Pluripotency	0	0.0168	GSK3B,SOX2
Renal Cell Carcinoma Signaling	0	0.0125	ETS1
Small Cell Lung Cancer Signaling	0	0.0141	NFKBIA
Endometrial Cancer Signaling	0	0.0167	GSK3B
Bladder Cancer Signaling	0	0.0103	MMP24
Chronic Myeloid Leukemia Signaling	0	0.00971	HDAC11
G Beta Gamma Signaling	0	0.0082	GNB2
Communication between Innate and Adaptive Immune Cells	0	0.0104	IL12A
Crosstalk between Dendritic Cells and Natural Killer Cells	0	0.0112	IL12A
Cdc42 Signaling	0	0.012	GSK3B,IQGAP1
EIF2 Signaling	0	0.0134	EIF4G3,EIF5,GSK3B
Hereditary Breast Cancer Signaling	0	0.0143	HDAC11,HLTF
Rac Signaling	0	0.018	CYFIP1,IQGAP1
Ovarian Cancer Signaling	0	0.00719	GSK3B
Role of NFAT in Cardiac Hypertrophy	0	0.0187	GNB2,GSK3B,HDAC11,PLCB1
Role of MAPK Signaling in the Pathogenesis of Influenza	0	0.0128	MAP3K5
OX40 Signaling Pathway	0	0.0111	NFKBIA
P2Y Purigenic Receptor Signaling Pathway	0	0.0157	GNB2,PLCB1
Role of Tissue Factor in Cancer	0	0.0167	LYN,PLCB1
Role of IL-17A in Arthritis	0	0.0185	NFKBIA
Dopamine-DARPP32 Feedback in cAMP Signaling	0	0.0123	PLCB1,PPP2R2C
NGF Signaling	0	0.00877	MAP3K5
Paxillin Signaling	0	0.0183	ACTN3,PXN
Transcriptional Regulatory Network in Embryonic Stem Cells	0	0.0185	SOX2
eNOS Signaling	0	0.00629	HSPA1L
VEGF Family Ligand-Receptor Interactions	0	0.0119	NRP2
ErbB Signaling	0	0.0106	GSK3B
ErbB2-ErbB3 Signaling	0	0.0154	GSK3B
GDNF Family Ligand-Receptor Interactions	0	0.0132	IRS1
Nicotine Degradation III	0	0.0179	CYP2C9
D-myo-inositol-5-phosphate Metabolism	0	0.0128	PLCB1,SOCS3
Melatonin Degradation I	0	0.0167	CYP2C9
Pyridoxal 5'-phosphate Salvage Pathway	0	0.0154	PRPF4B
Phospholipases	0	0.0164	PLCB1
D-myo-inositol (1,4,5,6)-Tetrakisphosphate Biosynthesis	0	0.00709	SOCS3
Nicotine Degradation II	0	0.0154	CYP2C9
Superpathway of Inositol Phosphate Compounds	0	0.0152	PLCB1,SOCS3,SYNJ2
D-myo-inositol (3,4,5,6)-tetrakisphosphate Biosynthesis	0	0.00709	SOCS3
3-phosphoinositide Degradation	0	0.0129	SOCS3,SYNJ2
3-phosphoinositide Biosynthesis	0	0.00606	SOCS3
Salvage Pathways of Pyrimidine Ribonucleotides	0	0.0103	PRPF4B
Superpathway of Melatonin Degradation	0	0.0154	CYP2C9
Antioxidant Action of Vitamin C	0	0.0187	NFKBIA,PLCB1
PEDF Signaling	0	0.0122	NFKBIA
Agranulocyte Adhesion and Diapedesis	0	0.0104	EZR,MMP24
Granulocyte Adhesion and Diapedesis	0	0.0112	EZR,MMP24
STAT3 Pathway	0	0.00741	SOCS3
Oxidative Phosphorylation	0	0.00917	NDUFA8
Cardiac β-adrenergic Signaling	0	0.0143	GNB2,PPP2R2C
FGF Signaling	0	0.0119	MAP3K5
JAK/Stat Signaling	0	0.0125	SOCS3
GABA Receptor Signaling	0	0.0105	SLC32A1
Xenobiotic Metabolism Signaling	0	0.0139	ABCC3,CYP2C9,MAP3K5,PPP2R2C
Chemokine Signaling	0	0.0125	PLCB1
Neurotrophin/TRK Signaling	0	0.0132	MAP3K5
PPAR Signaling	0	0.00962	NFKBIA
Dopamine Receptor Signaling	0	0.013	PPP2R2C
cAMP-mediated signaling	0	0.0176	GRM7,MC2R,NPR3,RAPGEF4
p38 MAPK Signaling	0	0.00847	MAP3K5
NF-κB Signaling	0	0.0168	GSK3B,NFKBIA,RELB
IL-6 Signaling	0	0.016	NFKBIA,SOCS3
GPCR-Mediated Integration of Enteroendocrine Signaling Exemplified by an L Cell	0	0.0137	PLCB1
GPCR-Mediated Nutrient Sensing in Enteroendocrine Cells	0	0.0179	PLCB1,RAPGEF4
Gustation Pathway	0	0.00654	PKD1L3
GP6 Signaling Pathway	0	0.0168	GSK3B,LYN
Opioid Signaling Pathway	0	0.016	GSK3B,LYN,NFKBIA,PLCB1
Iron homeostasis signaling pathway	0	0.0073	LRP1
NER Pathway	0	0.00971	COPS5
Endocannabinoid Developing Neuron Pathway	0	0.0087	GSK3B
Endocannabinoid Cancer Inhibition Pathway	0	0.014	CASQ1,GSK3B
Apelin Cardiomyocyte Signaling Pathway	0	0.0101	PLCB1
Apelin Endothelial Signaling Pathway	0	0.0087	PLCB1
Cardiac Hypertrophy Signaling (Enhanced)	0	0.0165	GSK3B,HDAC11,IL12A,IL17B,MAP3K5,NFAT5,NFATC2,PLCB1
Eicosanoid Signaling	0	0.0156	PTGER1

## Sheet: S2B. Networks
© 2000-2019 QIAGEN. All rights reserved.
ID	Molecules in Network	Score	Focus Molecules	Top Diseases and Functions	Prioritized Candidate Genes Present in the Network
1	ANKHD1/ANKHD1-EIF4EBP3,CER1,CK1,Dishevelled,DST,DUB,FAM89B,FOXJ2,FOXQ1,Frizzled,HIPK3,Jnk,LRP6,MARVELD3,MCMBP,MYLIP,NCOA2,NR2F2,POTEE/POTEF,PPM1A,QARS,RANBP3L,RNF13,SH3BP5,SH3GL2,Smad2/3,TH2 Cytokine,TRPS1,UBA6,USP32,USP39,Wnt,ZMYM3,ZMYM4,ZRANB2	44	27	[Cancer, Hematological Disease, Immunological Disease]	FOXJ2, FOXQ1, LRP6, MYLIP, QARS, SH3GL2, ANKHD1,ANKHD1-EIF4EBP3
2	ABCA2,Alpha tubulin,AMOTL2,ATAD1,ATPase,CCT3,ERK,FUBP1,GPAA1,ICE1,KANSL1,mediator,MKK3/6,NEURL4,OFD1,OSTM1,PHF20L1,Ppp2c,PPP2R2C,RAD51D,RNF213,RUVBL1,SIK2,SNAP25,Snare,SPAG5,SSSCA1,TIP60,TNKS2,TRRAP,TUBA8,TUBB2A,TUBE1,tubulin (family),YEATS4	41	26	[Developmental Disorder, Endocrine System Disorders, Hereditary Disorder]	ABCA2, ATAD1, FUBP1, PHF20L1, SSSCA1, TUBA8, TUBE1, RAD51D
3	ARHGAP44,Ck2,CYFIP1,ETS1,GTPase,HDAC11,HDL-cholesterol,HMGN4,Insulin,IQGAP1,KLF7,MYO18A,P-TEFb,PHF12,PP1 protein complex group,PPM1B,PRKDC,PRPF19,PRPF4B,PRPSAP2,RCC2,RNA polymerase II,Rnr,RPA,RRP1B,SFSWAP,SLMAP,SMC4,SPTAN1,SQLE,SRRM1,SUPT6H,SVIL,TRPC5,ZMIZ1	41	26	[Cell Death and Survival, Cellular Movement, RNA Post-Transcriptional Modification]	ARHGAP44, HMGN4, IQGAP1, KLF7, MYO18A, RCC2, SLMAP, SPTAN1
4	ARHGAP33,BAG6,C/EBP,CELF1,CELF2,CEP170B,CERK,CLCN3,ERK1/2,Fc gamma receptor,GMDS,growth factor,HDL,HLTF,ICK,IL12A,IL17B,IRF6,KIF2A,MIR124,Myosin,NADPH oxidase,Notch,PPP4R3B,Pro-inflammatory Cytokine,Rxr,SBF2,SEC16B,SNX1,SPECC1,SPHK1,TH1 Cytokine,TOM1L1,UNC45B,WDR35	34	23	[Connective Tissue Disorders, Lipid Metabolism, Small Molecule Biochemistry]
5	ANKS1A,ATG,ATG13,BECN1,Caveolin,CNTN2,CWC22,DAB2IP,Dynamin,EPB41L2,GAPVD1,I kappa b kinase,Ikb,LTBP2,MAP3K5,N-type Calcium Channel,NAPB,NFkB (family),NKAP,PI3K (complex),Rab5,RCN1,SCMH1,SEPT6,SOGA1,STRBP,STX18,Syntaxin,TBC1D16,TCF,TNRC18,TOM1L2,Ubiquitin,UGCG,ULK1	34	23	[Cell Morphology, Cellular Function and Maintenance, Embryonic Development]
6	Akt,CDH2,CDK4/6,CG,CLRN1,CNKSR3,Collagen Alpha1,collagen type i (family),DDR1,DLX4,DNA-PK,DUSP22,EIF5,FSH,GDF6,GMPS,GNL1,IRS1,KCNE1,Lh,LRP,N-Cadherin,NPR3,NTM,PCDH19,Presenilin,PTP4A1,PTPase,PTPRB,PTPRG,PTPRR,RAB33B,Secretase gamma,SYNJ2,SYNJ2BP	32	22	[Cardiovascular System Development and Function, Cell-To-Cell Signaling and Interaction, Nervous System Development and Function]
7	14-3-3,AGRN,ALX4,atypical protein kinase C,BCR (complex),BTAF1,Calcineurin protein(s),CaMKII,Cbp/p300,CHL1,CPXM2,DLX1,EIF4G3,EPHA1,Fcer1,Fgfr,FOXA3,HOXA11,HOXB9,NCAM1,NFAT (complex),Nfat (family),OTX2,Pkc(s),PLC gamma,PNKD,PTK,PTK6,RAPGEF4,RFFL,RIMS1,SAMD4A,SLC32A1,STK17B,SYN2	32	22	[Cell-To-Cell Signaling and Interaction, Embryonic Development, Nervous System Development and Function]
8	ABCB5,Actin,ACTN3,AJUBA,Alpha Actinin,Alpha catenin,Cadherin,CD81,CDH22,DSCAM,Erm,EZR,F Actin,GRAMD4,HIVEP1,HLA-DR,IFNA10,LPP,MFHAS1,Mlc,NFkB (complex),P glycoprotein,Pak,PLK3,Rho gdi,RHOB,RHOJ,Rock,RTF1,SLC2A6,Spectrin,TCEAL7,TJP3,TNS1,TTN	30	21	[Cell-To-Cell Signaling and Interaction, Cellular Assembly and Organization, Cellular Function and Maintenance]
9	26s Proteasome,ADAMTS9,ALAD,Ap1,BIRC6,BPTF,caspase,CASQ1,CD3,COPS5,Creb,CYP2W1,cytochrome C,cytokine,EHMT2,GLS,GRIA3,HISTONE,Histone h3,HNF4G,HSPA1L,IKK (complex),IL1,KIRREL3,Metalloprotease,NFKBIA,NIPBL,PSMD5,Ras homolog,RELB,RMST,SHLD2,SOX2,TCR,TRMT61A	30	21	[Cancer, Cellular Growth and Proliferation, Tissue Development]
10	CBFA2T2,collagen,Collagen type I (complex),Collagen type IV,Collagen(s),DCBLD2,DPP4,DPYD,EDEM1,ELOVL2,EPHB6,F11,FAM107B,Fibrinogen,Hsp27,HSPG2,Integrin,JINK1/2,Laminin (complex),MAP2K1/2,Mek,NOTCH3,P38 MAPK,Pdgf (complex),PDGF BB,PI3K (family),PIEZO1,PLOD2,PP2A,PREX1,PXN,Rap1,Serine Protease,TMPRSS7,TRAM2	22	17	[Cancer, Gastrointestinal Disease, Organismal Injury and Abnormalities]
11	AAMP,ANKS3,AP3S2,ARPC1A,ARPC1B,ATG16L2,ATG2A,BLOC1S5,CCDC144B,CDC123,CEP120,CEP78,CPEB2,DICER1,EPPK1,ERI1,FAM227A,FAM91A1,FBXW7,FRMD4B,HIST1H2AD,HUWE1,KCTD20,KIAA1191,LSM14B,miR-204-5p (and other miRNAs w/seed UCCCUUU),N4BP3,PALMD,PCCB,PDAP1,PDCD2L,SNTB2,WDR81,XPO1,ZC2HC1A	21	16	[Auditory Disease, Cellular Assembly and Organization, Infectious Diseases]
12	Abi2-Nap125-Pir121,CD302,CEACAM3,CPXCR1,FAM135B,FIRRE,FOXD2-AS1,FUK,H60a,HCG18,HNF1A,HNRNPU,HSPA9,KAT5,KRTAP10-11,KRTAP10-3,KRTAP4-2,LINC00630,LMO1,MTORC1,NCKAP1L,NOTCH1,PAFAH2,PGAP2,PHC2,PRINS,Rac,RD3L,SLC44A4,SPAG11B,TNF,TRAF6,ZNF155,ZNF442,ZNF559	19	15	[Cancer, Cellular Response to Therapeutics, Organismal Injury and Abnormalities]
13	ADCY,Calmodulin,G-protein beta,Gli,GNB2,GRM7,Growth hormone,Gsk3,GSK3B,Hdac,Histone h4,Hsp70,Hsp90,MAPKAP1,MC2R,N-cor,Nos,NPSR1,Nr1h,p70 S6k,Pka,Pka catalytic subunit,PLC,PLCB1,PPP1R18,PRKAA,Proinsulin,PTCH1,RABL3,RAMP2,RAS,RHO,SBNO2,SLIT1,tubulin	17	14	[Cell Death and Survival, Cell-To-Cell Signaling and Interaction, Cellular Compromise]
14	AEBP2,ARHGAP19,BCL6,BRD2,CYP2C9,hemoglobin,IFI6,Ifn,IFN Beta,Ifnar,Iga,Ige,IgG,IgG1,IgG2a,Igm,IL12 (complex),IL12 (family),Immunoglobulin,Interferon alpha,JAK,JUN/JUNB/JUND,LDL,LYN,Mapk,MARCKS,MHC Class II (complex),NFAT5,NFATC2,NUP98,OAS1,SOCS3,STAT5a/b,Tgf beta,Tlr	15	13	[Cellular Development, Humoral Immune Response, Protein Synthesis]
15	ABHD4,ARHGAP6,ATAT1,C7orf50,CDC42BPG,CYLD,DUSP26,FAM186B,FAM222B,GSDMA,HNRNPL,IGSF9,INPP5F,KIAA1109,KIZ,MICU3,MSRA,NBPF10 (includes others),NEK4,NLK,PNPLA7,PPFIBP2,PPIP5K1,PTPRC,SCAF11,SETBP1,SLC35A3,SLFN12,SMG6,STAT,STYXL1,TECTA,TIGAR,TP53INP1,TTC21B	15	13	[Hereditary Disorder, Ophthalmic Disease, Organismal Injury and Abnormalities]
16	ACOT13,Alp,C12orf57,CIDEB,CSRNP3,DIP2C,EMILIN2,Esr1-Esr1-estrogen-estrogen,ISM1,KCNK10,KCNQ3,KCTD20,KIAA0100,MFSD12,MICB,MN1,MYPN,NELL1,NRIP3,PCDH11X,PHACTR1,PPARGC1A,PPIP5K1,PPP1CA,PPP1R14C,RHBDL2,SETD3,SLC7A14,SMARCA4,SPOCD1,TDRD9,TMEM214,TRIM25,UBN1,ZCCHC24	15	13	[Cell Morphology, Cellular Assembly and Organization, Molecular Transport]
17	ADGRG6,ANKRD55,Ccr2,CDKN2B-AS1,DCHS1,EED,EIF4EBP3,EPHX4,ER-α-Estradiol,ERICH6,ESR1,Esr1-Estrogen-Sp1,FGD5,GALNT14,GASK1B,GPR108,GPR176,GPR78,GPR88,HCN3,HCP5,HLA-J,HSPB1,LUCAT1,NKX2-3,OR4K17,PALM3,PIK3CA,PLEC,SCUBE2,SLC13A4,SZT2,TNF,VARS2,ZBTB11	15	13	[Hematological System Development and Function, Immunological Disease, Lymphoid Tissue Structure and Development]
18	ABCC3,AMIGO1,AMPK,calpain,CAPN11,Cyclin A,Cyclin E,EPHX4,estrogen receptor,Focal adhesion kinase,G protein,G protein beta gamma,Gpcr,LRP1,LY75,MELTF,Mmp,MMP24,MMUT,MTO1,NMDA Receptor,NRP2,OSBP,p85 (pik3r),PARP,Pdgfr,PI3K p85,Rb,Sfk,Shc,Sos,SRC (family),Tnf (family),trypsin,Vegf	14	12	[Cell-To-Cell Signaling and Interaction, Cellular Function and Maintenance, Cellular Movement]
19	APP,BCL9L,C12orf50,CCDC196,CELF4,CNTN3,DLG4,DSCAML1,FAM126B,FAM184A,FAM50B,FRMPD3,GOLGA2,HRASLS5,ITM2C,LRRTM3,MAB21L2,MARCH10,MRGPRE,NDUFA8,Neuroligin,PAX6,PIEZO2,PIGG,PITX3,RALGPS1,RBPJL,RHNO1,RITA1,SV2B,TACO1,TFIP11,VPS33B,WWC3,YAP1	14	12	[Developmental Disorder, Hereditary Disorder, Ophthalmic Disease]
20	ADAT1,ARNT,B4GALT4,C18orf54,C6orf62,CCDC58,CIPC,DCAF15,DMAC2,DRP2,EGLN3,ELAVL1,GIPC3,HNRNPK,IER3IP1,MOV10,MXRA7,PITHD1,RNF212,SDE2,SLC38A6,SMIM11A,STPG2,SZRD1,TATDN2,TBCCD1,TF,TICRR,TIMM22,TTC13,XXYLT1,ZCCHC14,ZNF561,ZNF623,ZNF770	14	12	[Organ Morphology, Organismal Injury and Abnormalities, Reproductive System Development and Function]
21	1-O-hexadecyl-2-N-methylcarbamol-sn-glycerol-3-phosphocholine,ADTRP,basic calcium phosphate crystal,Ca2 ,Cabp1,Calmodulin-CaMKII-Ca2 ,CaMK I,chitosan,CREB1,Cyp1a/2a/3a/4a/2c,CYP46A1,CYP4A22,CYTOR,fructose 1,6 biphosphatase,GUCA,GUCA1A,GUCA1B,GUCA2B,KCND1,leukotriene A4,MCFD2,MCHR2,MMRN2,NEXMIF,NFE2L2,NRSN1,OPN4,PPARA,pristanic acid,RFX4,RIPOR2,SERINC2,SLC24A4,VDR,XKR4	14	12	[Cell-To-Cell Signaling and Interaction, Cellular Development, Connective Tissue Development and Function]
22	ABCB5,Acaa1b,Adig,ANGEL2,ARRB2,ASH2L,C4BPB,CAPN15,CBR3-AS1,CHDH,CORIN,COX16,DISP2,DNAH17,DNAH2,ERBB2,EZH2,FALEC,FAS,HOXD1,KBTBD8,MEG3,MLXIP,MSMB,MYOM3,OLFML3,PKD1L3,PPARG,PRSS22,SPAG4,Srp30,TGFB1,UCA1,UCK1,ZNF157	12	11	[Cancer, Cell Cycle, Gene Expression]
23	ABHD16A,ABHD6,ADAMTSL1,CERCAM,CMC2,CYBC1,D-glucose,DUSP6,GBP5,GLYAT,HNF4A,ITGB1,METAP1D,mir-484,mir-802,NPNT,OBP2B,PANK1,PEX12,PLAUR,PLEKHA3,PLGRKT,RBAK,RDH14,RNF4,SCYL3,SDR16C5,SGSH,VEZF1,WDR11,WDR13,ZBED3,ZFP37,ZNF239,ZNF502	12	11	[Cell Morphology, Cell-To-Cell Signaling and Interaction, Cellular Function and Maintenance]
24	ADGRD2,Adgre4,ADGRF4,BROX,CHTF8,CUTA,EWSR1,EXTL3,FN1,Gpcr,GPR148,GPR150,GPR152,GPR153,GPR179,GPR82,GRB2,Htr1e,LPAR1,MANF,MAS1L,NPFFR1,OXGR1,phosphatidylinositol 4,5-diphosphate,PTGER1,RRH,SDCBP,SP8,SYNPR,TAAR8,TMEM246,USH2A,VN1R2,VN1R4,VN1R5	12	11	[Carbohydrate Metabolism, Lipid Metabolism, Small Molecule Biochemistry]
25	RPL15,ZNF385D	2	1	[Cancer, Cardiovascular Disease, Developmental Disorder]
